# Supplementary material
Source: publisher site journal article supplement (https://www.dovepress.com/article/250633)
Supplement: Supplementary file 1 [file get_supplementary_file.php]

**Supplementary Information**

**SI 1.** Specific scan sequence and parameters of MRI

| scan sequence | pulse sequence | TR (ms) | TE (ms) | slice(mm) | gap(mm) | FOV (mm×mm) | matrix | NSA |
| --- | --- | --- | --- | --- | --- | --- | --- | --- |
| Sagittal T2WI | TSE | 4978.00 | 100.00 | 1.50 | 0.15 | 240×180 | 240161 | 2 |
| Axial T2WI | TSE | 3000.00 | 100.00 | 3.00 | 0.00 | 220×220 | 276×238 | 3 |
| Axial T1WI | TSE | 556.00 | 8.00 | 5.00 | 0.00 | 249×415 | 276×406 | 1 |
| Axial DWI | SS-EPI | 6000.00 | 77.00 | 3.00 | 0.00 | 260×260 | 104×125 | 2 |
| Axial DCE-MRI | e-THRIVE | 3.10 | 1.45 | 3.00 | 0.00 | 220×220 | 124×121 | 2 |

Abbreviations：TR, repetition time; TE, echo time; FOV, field of view; NSA, number of signal average; T2WI, T2-weighted imaging; T1WI, T1-weighted imaging; DWI, multi-b values (b=0, 200, 1000, 2000 s/mm2) diffusion weighted imaging; DCE-MRI, dynamic contrast enhanced MR imaging; TSE, turbo spin-echo; SS-EPI, single-shot echo-planar imaging; e-THRIVE, enhanced T1 high resolution isotropic volume excitation

**SI 2.** Ellipsoid volume formula

Where D1, D2 and D3 are the diameters of the ellipsoid in three orthogonal directions, respectively.

Abbreviation: PV, prostate volume

**SI 3.** The equation for calculating the net benefits of a series of different threshold probabilities (*Pt*)

Where threshold probability (*Pt*) is the probability at which the effect of a false-positive intervention is equal to the effect of a false-negative non-intervention.

**SI 4.** The regression equations of prediction **model1** and **model2**

**Model1：**

**Model2：**

Abbreviations: csPCa, clinically significant prostate cancer; f/t, free-to-total prostate-specific antigen ratio; PSAD, prostate-specific antigen density; PI-RADS, Prostate Imaging Reporting and Data System

**SI 5.** The equation for calculating the probability (*P*) of csPCa appearing in an individual
